# Supplementary material for: Controllable synthesis of core–satellite Fe3O4@polypyrrole/Pd nanoarchitectures with aggregation-free Pd nanocrystals confined into polypyrrole satellites as magnetically recoverable and highly efficient heterogeneous catalysts
Source: Royal Society of Chemistry journal article supplement (doi:10.1039/c5ra17413a), 2015-01-01
Supplement: c5ra17413a1.pdf [file c5ra17413a1.pdf]

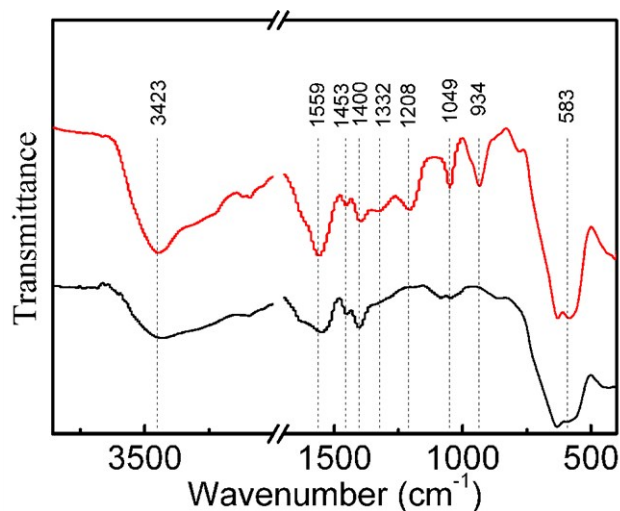

**Fig. S1** FT-IR spectra of PAA-modified Fe<sub>3</sub>O<sub>4</sub> nanoclusters (a) and Fe<sub>3</sub>O<sub>4</sub>@PPy/Pd nanocomposites (b).

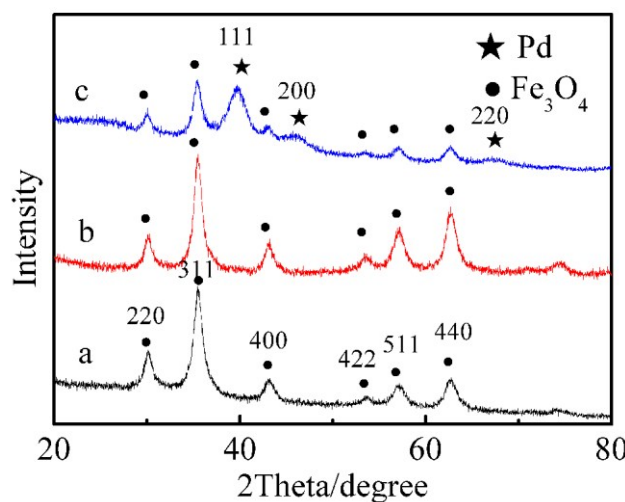

**Fig. S2** XRD patterns of PAA-modified Fe<sub>3</sub>O<sub>4</sub> nanoclusters (a) and Fe<sub>3</sub>O<sub>4</sub>@PPy/Pd nanocomposites synthesized in mixed solvent with the ethanol/water volume ratio at 1:1 (b) and pure water (c).

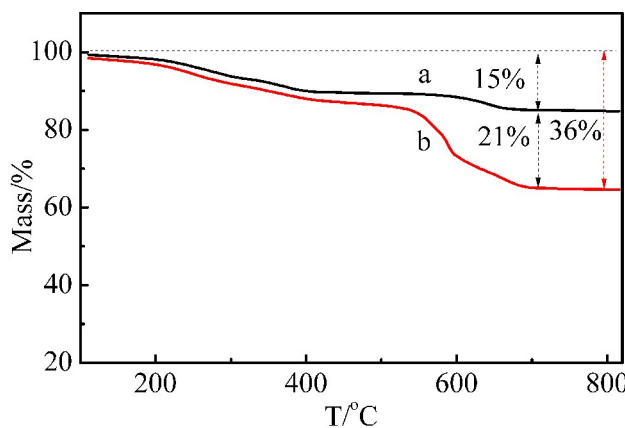

**Fig. S3** TG curves of samples: PAA-modified Fe<sub>3</sub>O<sub>4</sub> nanoclusters (a) and Fe<sub>3</sub>O<sub>4</sub>@PPy/Pd nanocomposites (b).

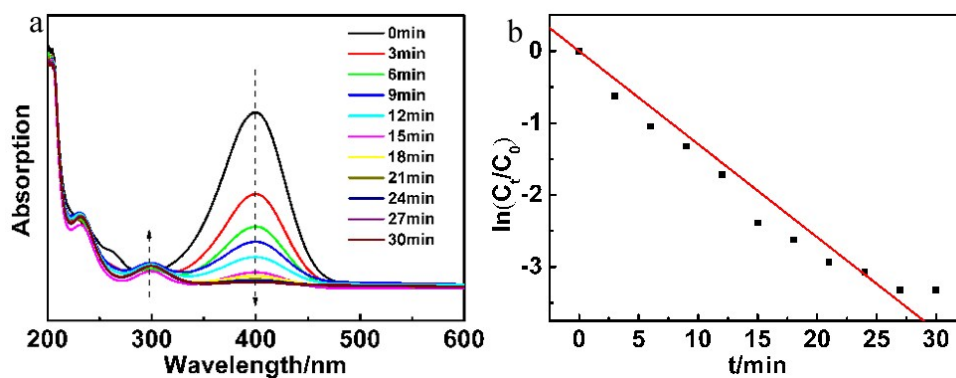

Fig. S4 Time-dependent UV/Vis spectra of 4-NP catalyzed by  $\text{Fe}_3\text{O}_4@\text{PPy}/\text{Pd}$  nanocomposite (a), The plot of  $\ln(C_t/C_0)$  against the reaction time (t) for the reduction of 4-NP (b).

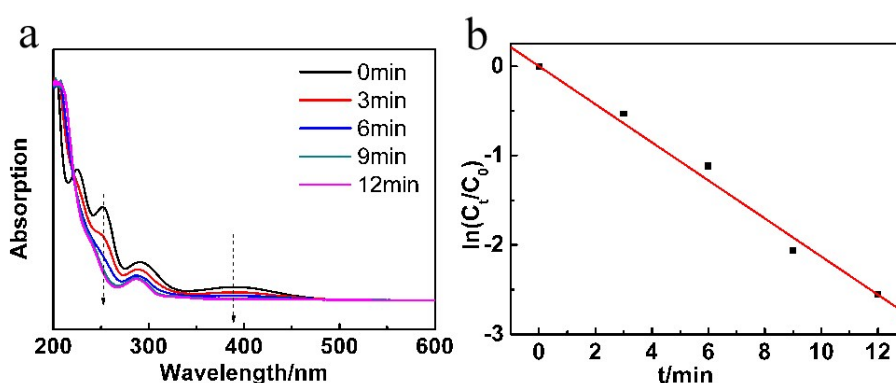

Fig. S5 Time-dependent UV/Vis spectra of 3-NP catalyzed by  $\text{Fe}_3\text{O}_4@\text{PPy}/\text{Pd}$  nanocomposite (a), The plot of  $\ln(C_t/C_0)$  against the reaction time (t) for the reduction of 3-NP (b).

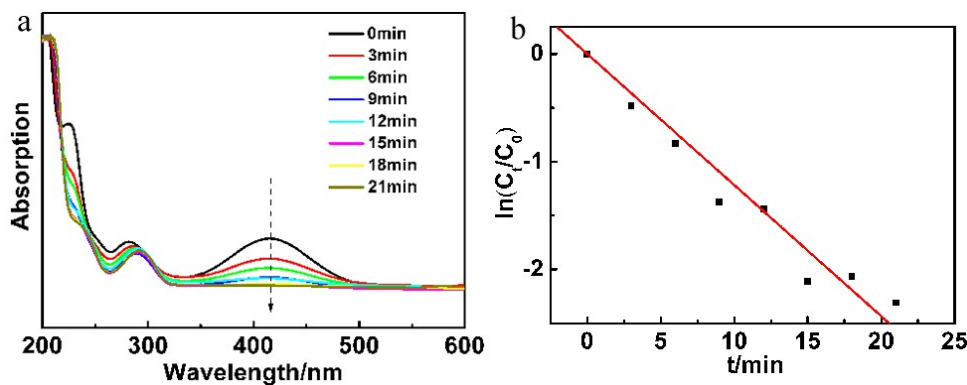

Fig. S6 Time-dependent UV/Vis spectra of 2-NP catalyzed by  $\text{Fe}_3\text{O}_4@\text{PPy}/\text{Pd}$  nanocomposite (a), The plot of  $\ln(C_t/C_0)$  against the reaction time (t) for the reduction of 2-NP (b).

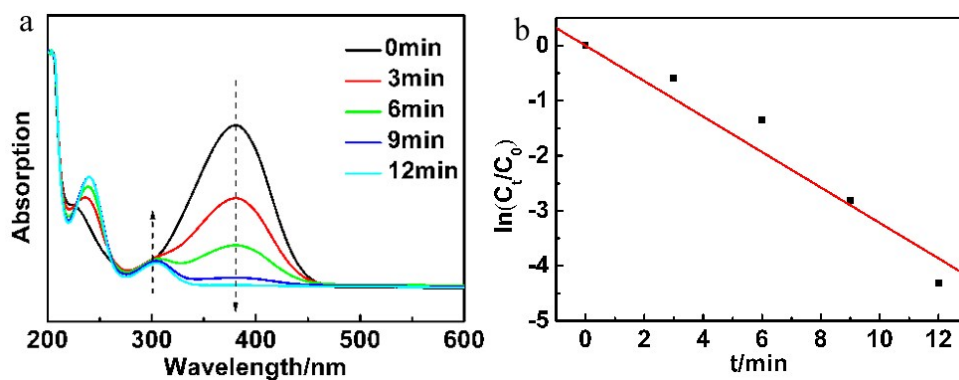

**Fig. S7** Time-dependent UV/Vis spectra of 4-NA catalyzed by  $\text{Fe}_3\text{O}_4@\text{PPy}/\text{Pd}$  nanocomposite (a), The plot of  $\ln(C_t/C_0)$  against the reaction time ( $t$ ) for the reduction of 4-NA (b).

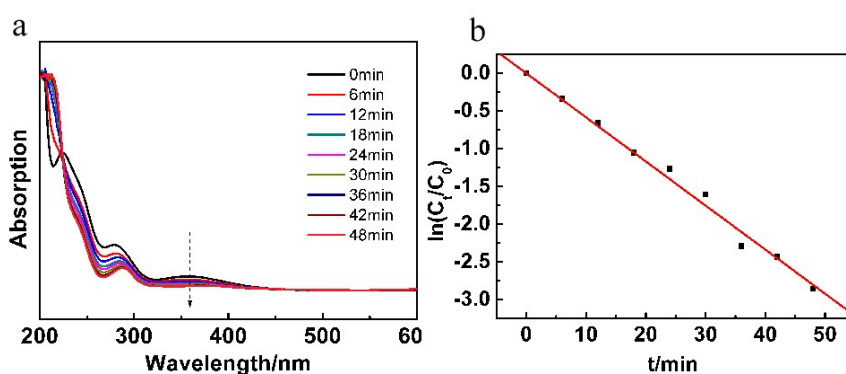

**Fig. S8** Time-dependent UV/Vis spectra of 3-NA catalyzed by  $\text{Fe}_3\text{O}_4@\text{PPy}/\text{Pd}$  nanocomposite (a), The plot of  $\ln(C_t/C_0)$  against the reaction time ( $t$ ) for the reduction of 3-NA (b).

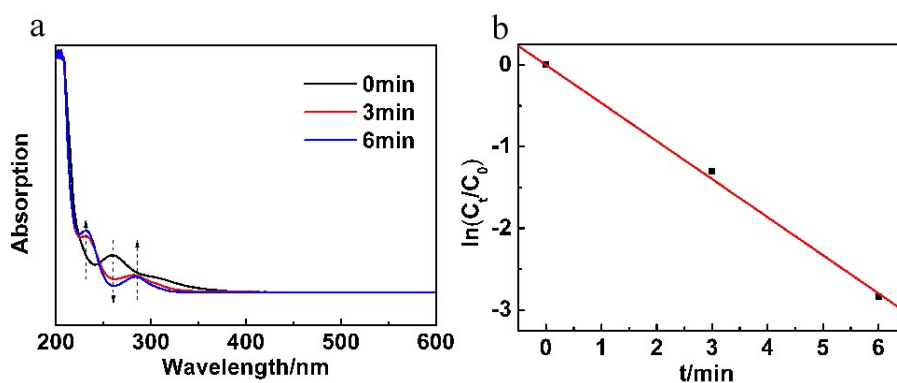

**Fig. S9** Time-dependent UV/Vis spectra of 1-Chloro-2-nitrobenzene catalyzed by  $\text{Fe}_3\text{O}_4@\text{PPy}/\text{Pd}$  nanocomposite (a), The plot of  $\ln(C_t/C_0)$  against the reaction time ( $t$ ) for the reduction of 1-Chloro-2-nitrobenzene (b).

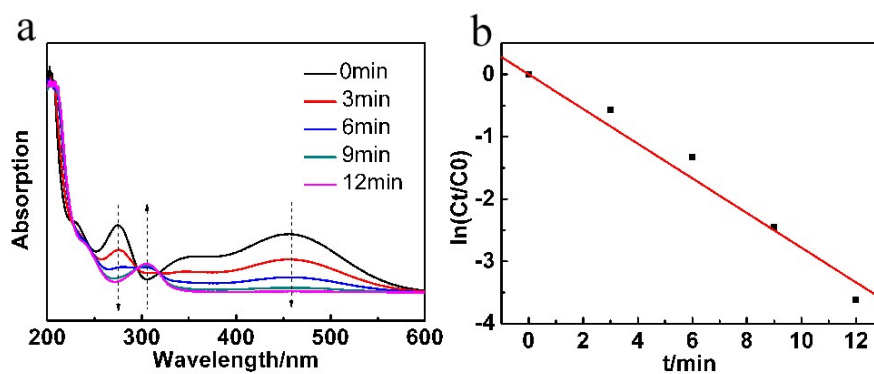

**Fig. S10** Time-dependent UV/Vis spectra of 2-Amino-5-nitrophenol catalyzed by  $\text{Fe}_3\text{O}_4@\text{PPy}/\text{Pd}$  nanocomposite (a), The plot of  $\ln(C_t/C_0)$  against the reaction time ( $t$ ) for the reduction of 2-Amino-5-nitrophenol (b).

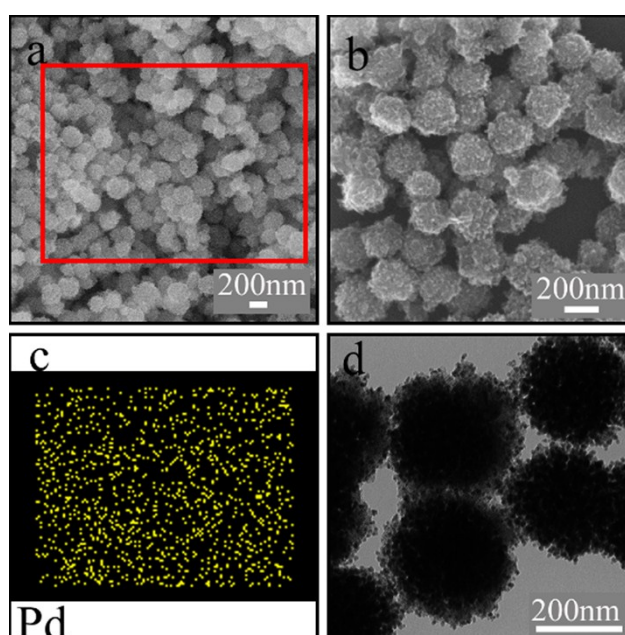

**Fig. S11** SEM images (a, b), Pd element EDS mapping image (c) and TEM image (d) of the recovered  $\text{Fe}_3\text{O}_4@\text{PPy}/\text{Pd}$  nanocomposites after ten cycles for catalytic reduction of 2-NA.

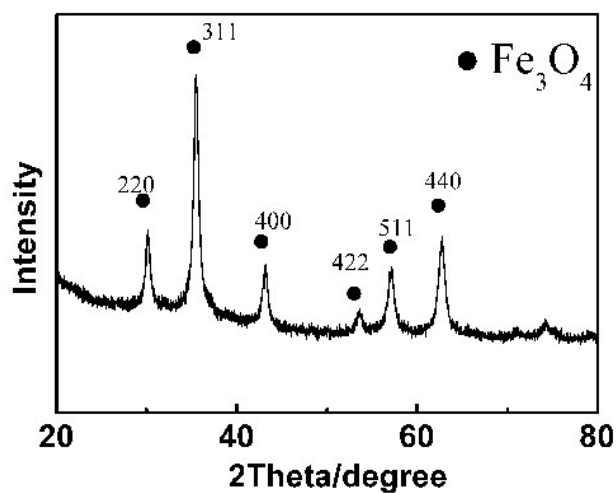

**Fig. S12** XRD spectrum of the recovered  $\text{Fe}_3\text{O}_4@\text{PPy}/\text{Pd}$  nanocomposites after ten cycles for catalytic reduction of 2-NA.

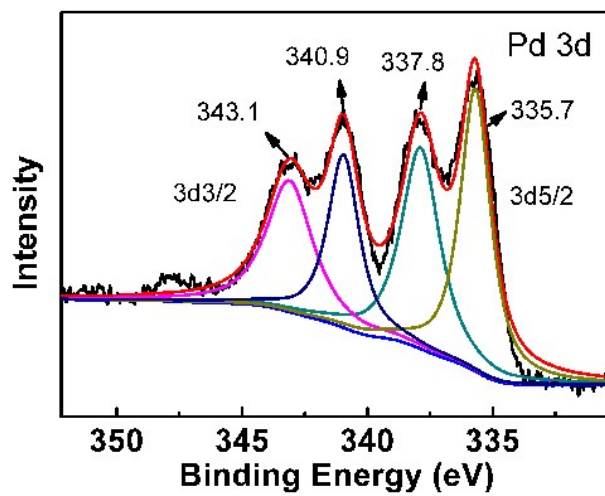

**Fig. S13** XPS spectra of Pd 3d core electrons in the recovered  $\text{Fe}_3\text{O}_4@\text{PPy}/\text{Pd}$  nanocomposites after ten cycles for catalytic reduction of 2-NA.
